# Supplementary material for: CALCRL Gene is a Suitable Prognostic Factor in AML/ETO+ AML Patients
Source: Hindawi journal article supplement (doi:10.1155/2022/3024360), 2022-03-16

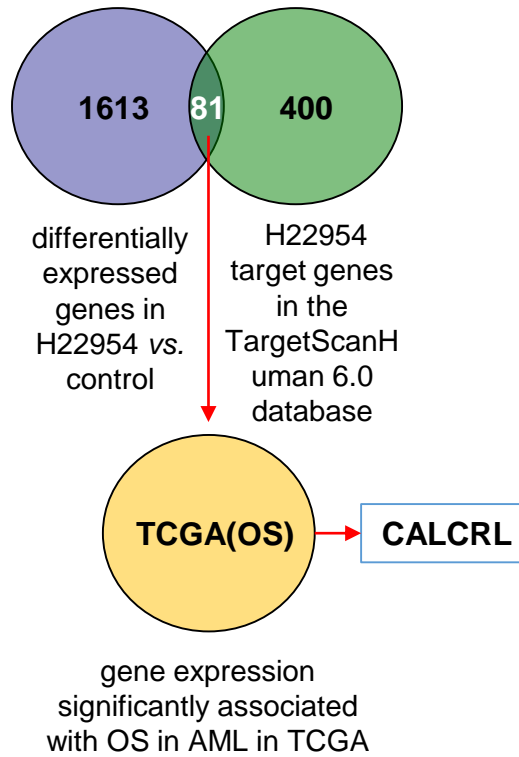

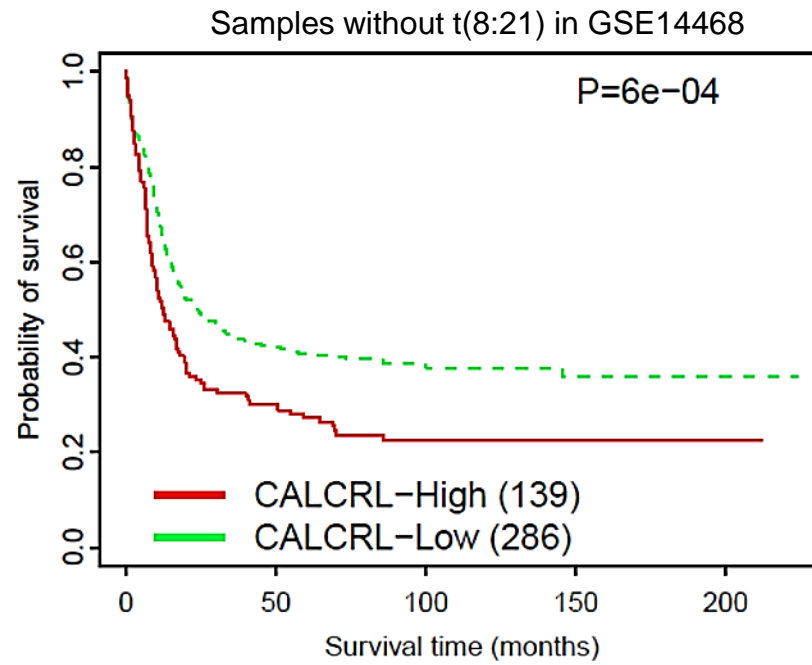

**A**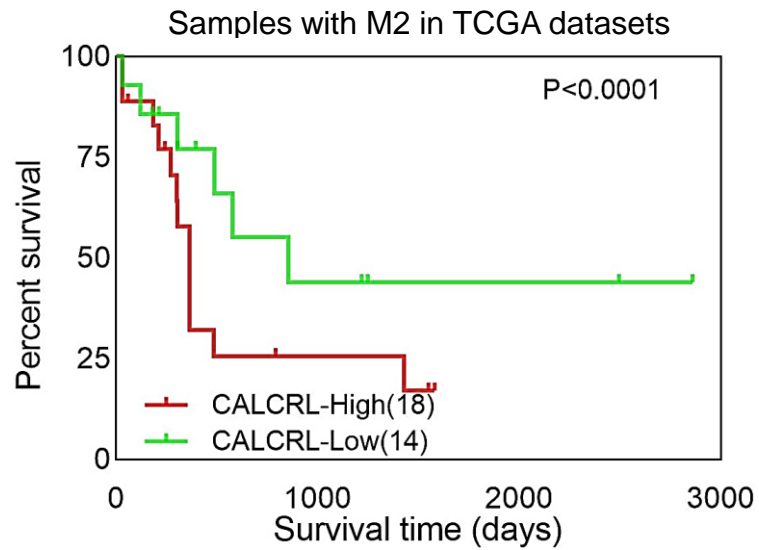**B**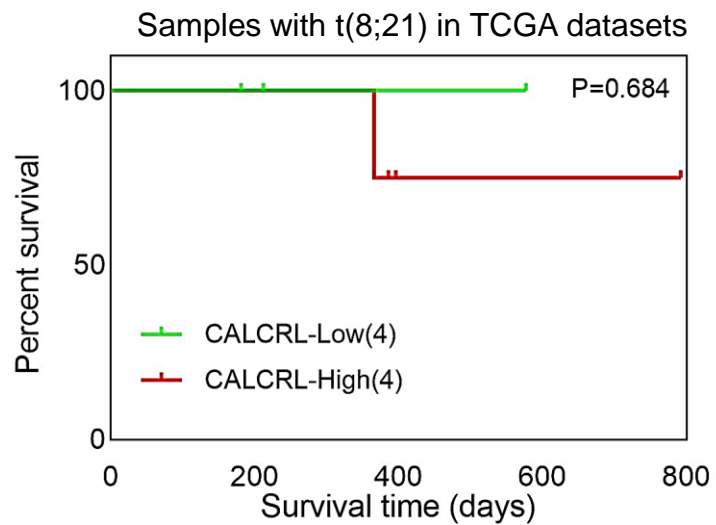**C**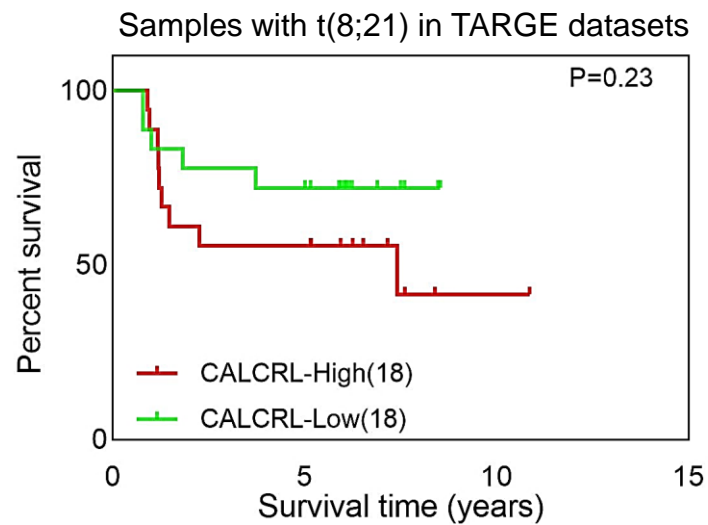

Supplement: f1 [file 3024360.f1.pdf]
